# Supplementary material for: The Lysine Demethylase dKDM2 Is Non-essential for Viability, but Regulates Circadian Rhythms in Drosophila
Source: PubMed Central journal article supplement (PMC6131532; doi:10.3389/fgene.2018.00354), 2018-09-04
Supplement: Table_1.pdf [file Table_1.pdf]

**Table S1. Effects of dKDM2 mutation or overexpression on circadian behaviors**

| <b>Genotypes</b>                           | <b>Period (h)</b> | <b>Rhythmicity</b> | <b>Power</b> | <b>N</b> |
|--------------------------------------------|-------------------|--------------------|--------------|----------|
| <i>w<sup>1118</sup></i>                    | 24.9±0.11         | 87.00%             | 64.6±4.01    | 54       |
| <i>dKdm2<sup>2</sup></i>                   | 23.5±0.14         | 59.30%             | 44.3±3.82    | 59       |
| <i>dKdm2<sup>1</sup></i>                   | 23.8±0.16         | 37.00%             | 44.0±5.04    | 54       |
| <i>dKdm2<sup>1</sup>/dKdm2<sup>2</sup></i> | 23.8±0.11         | 81.00%             | 69.7±6.18    | 42       |
| <i>TG4/+</i>                               | 24.6±0.06         | 90.10%             | 74.4±3.55    | 71       |
| <i>UAS-dKdm2-EGFP/+</i>                    | 23.8±0.16         | 100%               | 66.7±4.20    | 16       |
| <i>TG4/UAS-dKdm2-EGFP</i>                  | 25.7±0.06         | 94.70%             | 82.4±2.16    | 75       |
| <i>PG4/+</i>                               | 24.7±0.08         | 76.20%             | 69.3±3.82    | 42       |
| <i>PG4/UAS-dKdm2-EGFP</i>                  | 25.6±0.06         | 96.70%             | 78.6±2.75    | 61       |
| <i>TG4/+;pdf-Gal80/+</i>                   | 24.1±0.09         | 91.20%             | 70.1±5.57    | 34       |
| <i>TG4/+;pdf-Gal80/UAS-dKdm2-EGFP</i>      | 24.7±0.08         | 92.30%             | 79.1±4.20    | 26       |
